# Supplementary material for: The cell surface hyaluronidase TMEM2 regulates cell adhesion and migration via degradation of hyaluronan at focal adhesion sites
Source: PubMed Central journal article supplement (PMC8042168; doi:10.1016/j.jbc.2021.100481), 2021-02-26
Supplement: mmc1.pdf [file mmc1.pdf]

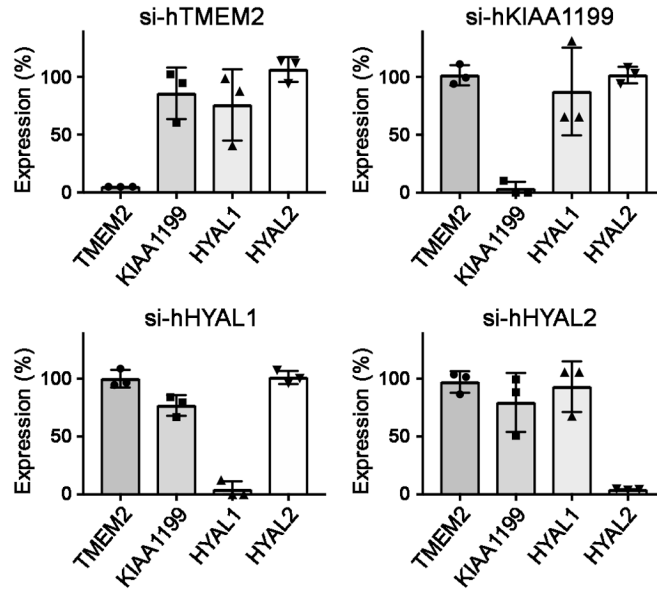

**Fig. S1: Effects of siRNAs on hyaluronidase expression in U2OS cells.** U2OS cells were treated with siRNAs to TMEM2 (*si-hTMEM2*), KIAA1199 (*si-hKIAA1199*), HYAL1 (*si-hHYAL1*), or HYAL2 (*si-hHYAL2*) for 3 days, and total RNA was isolated and analyzed by TaqMan qPCR. See Experimental Procedures for the TaqMan primer/FAM-conjugated probe sets used in these assays. Hyaluronidase mRNA was normalized to GAPDH mRNA. Expression of change in siRNA-treated cells to control cells is calculated using  $\Delta\Delta C_t$  method. Data represent mean  $\pm$  SD from 3 biological replicates.
